# Supplementary material for: Linking hydraulic traits to tropical forest function in a size-structured and trait-driven model (TFS v.1-Hydro)
Source: Copernicus journal article supplement (doi:10.5194/gmd-2016-128), 2016-06-14
Supplement: Supplementary file [file gmd-2016-128-AC1-supplement.zip]

## Supplement S2: Alternate versions of trait synthesis figures

**Fig. S2.1** Version of Fig. 3 of main text, but without applying correction factor to PV curves conducted on trunk cores and showing the residual fraction ( $r_f = RWC_r$ ) instead of relative water deficit at turgor loss ( $R_{tlp,x} = 1 - RWC_{tlp,x}$ ). Symbols and asterisk codes as in Fig. 2 of main text.

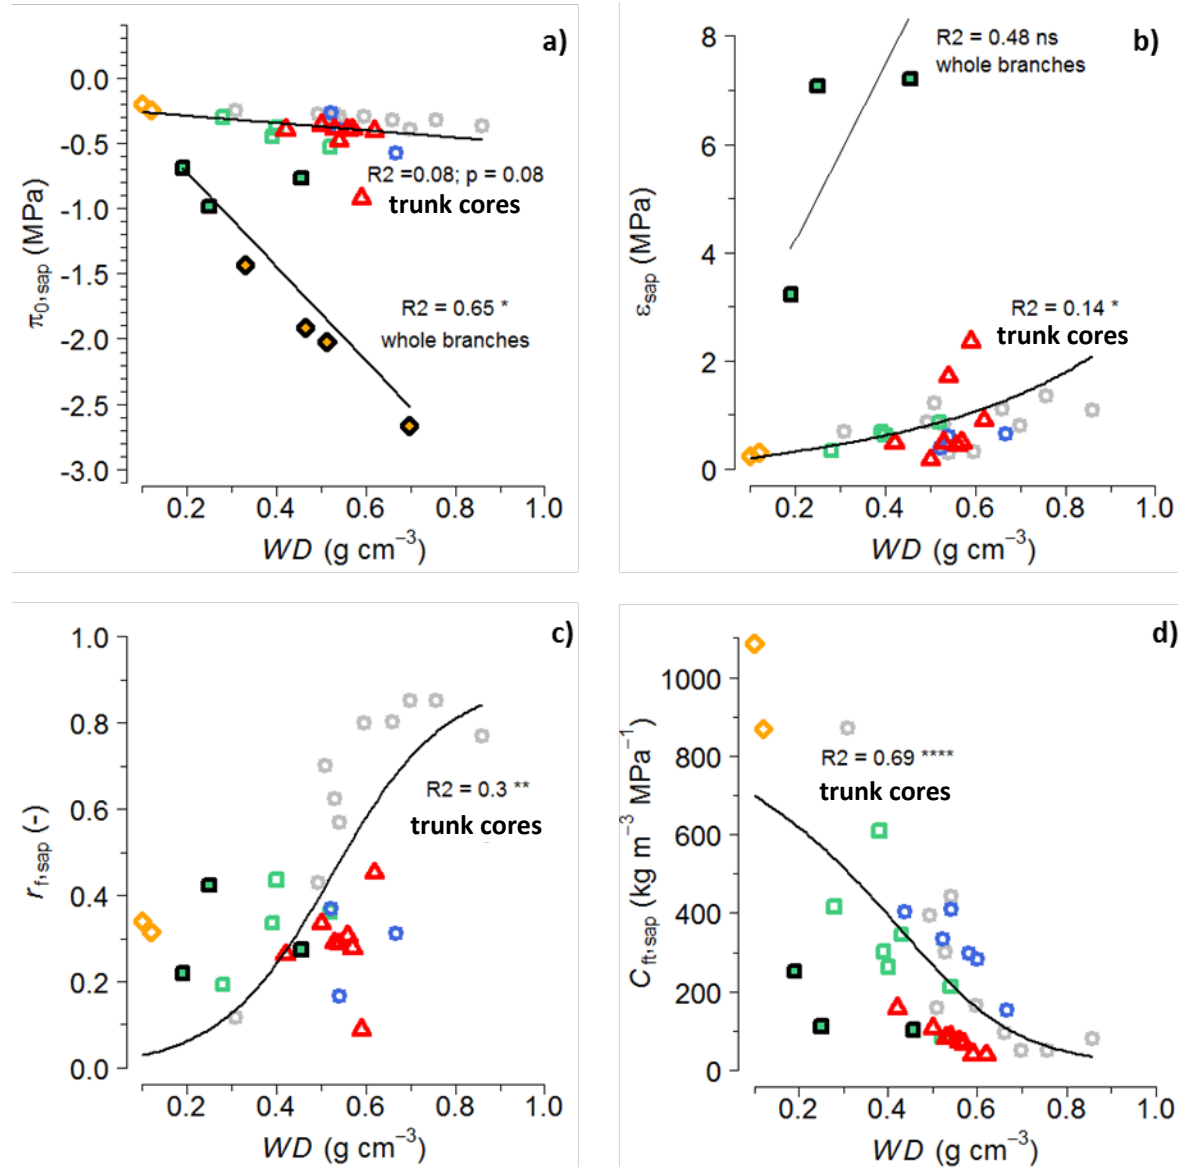

**Fig. S2.2** Version of Fig. 5 a) – c) of the main text, but instead of maximum xylem conductivity per unit leaf area ( $k_{l,max}$ ), maximum xylem conductivity per unit *cross-sectional sapwood area* ( $k_{s,max}$ ) Symbols and asterisk codes as in Fig 2 of main text.

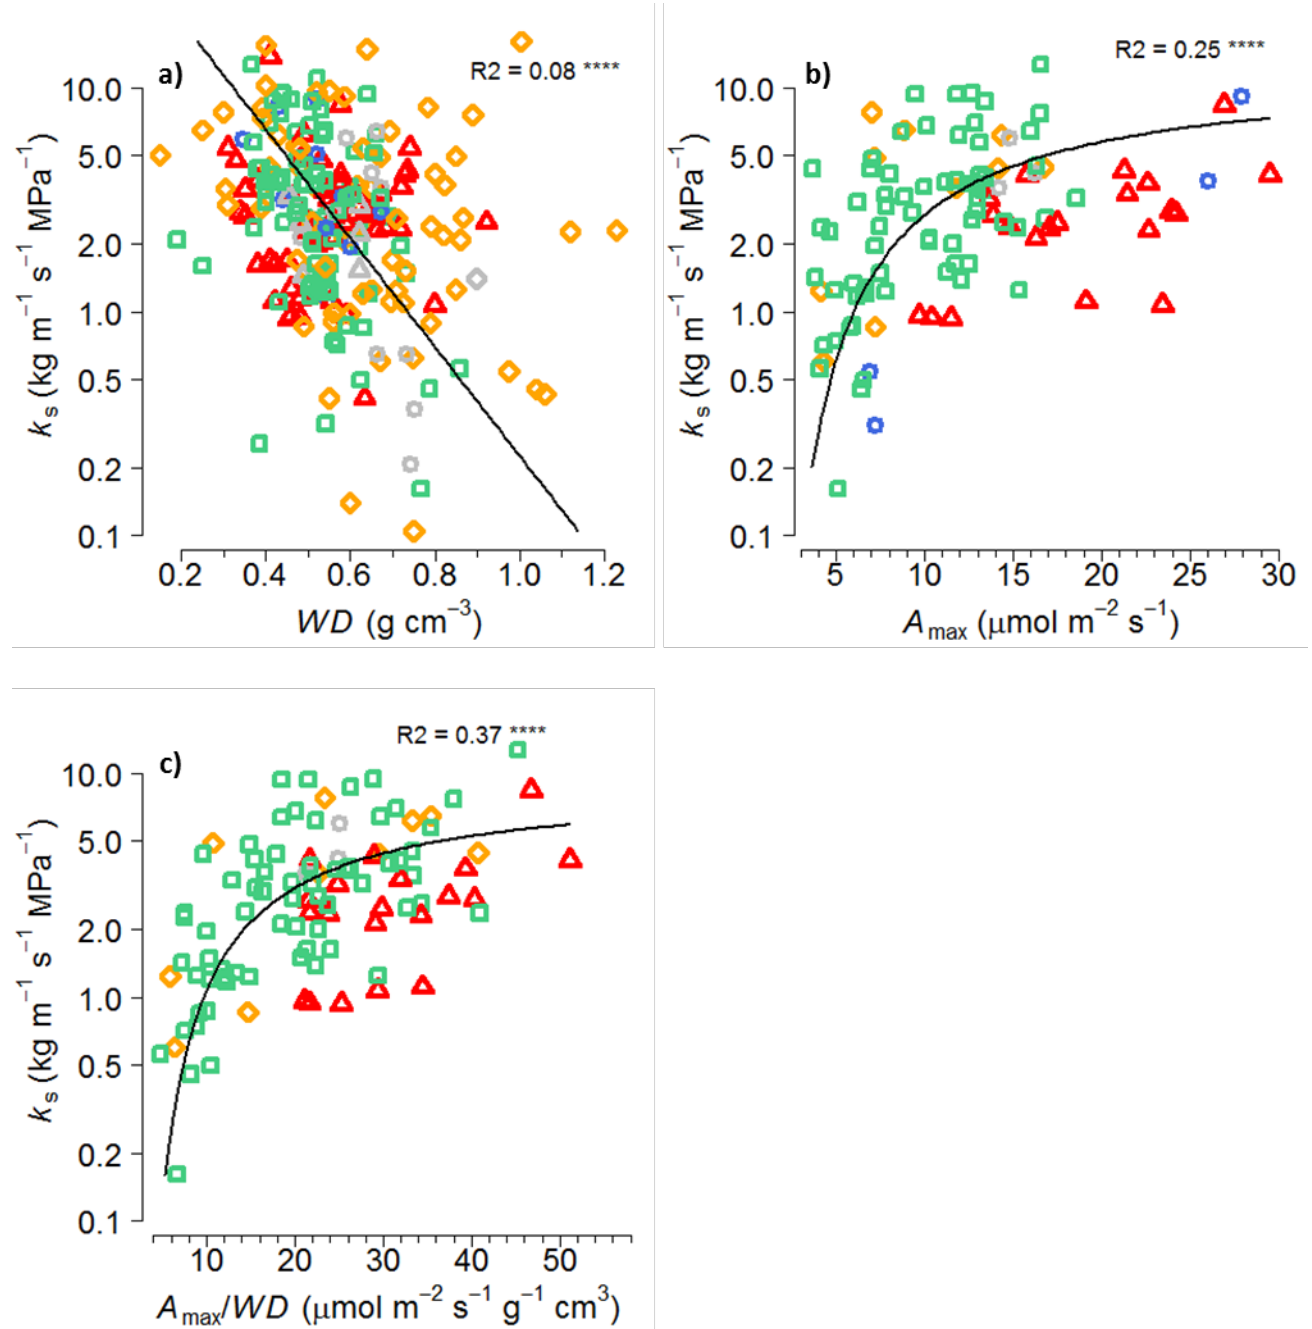

**Fig. S2.3** Version of Fig. 8b of the main text without applying correction factor to sapwood PV curves, taking published capacitance at face value. Symbols as in Fig. 8 of main text.

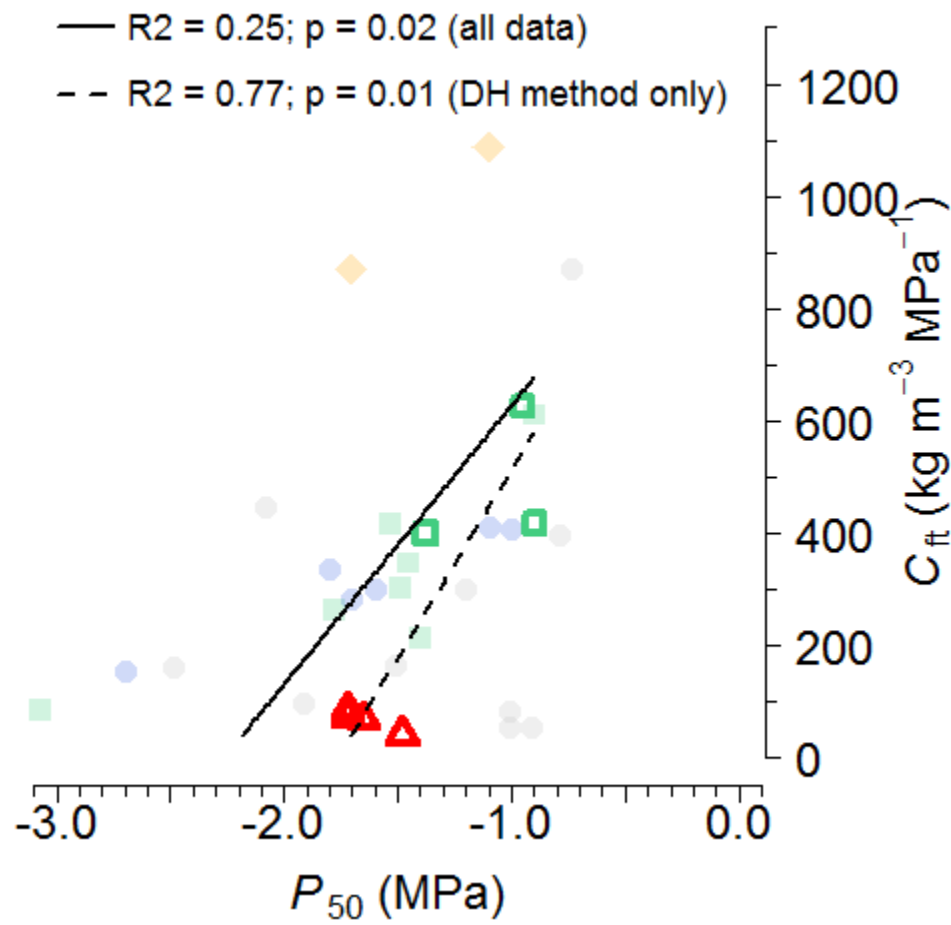

### Supplement S3: Additional model output

**Fig. S3.1** Modeled diurnal profiles of integrated (across all individual trees) total community transpiration rate (black), sap flow rate (blue), and root uptake rate (red) for a single day during the wet season at Caxiuana.

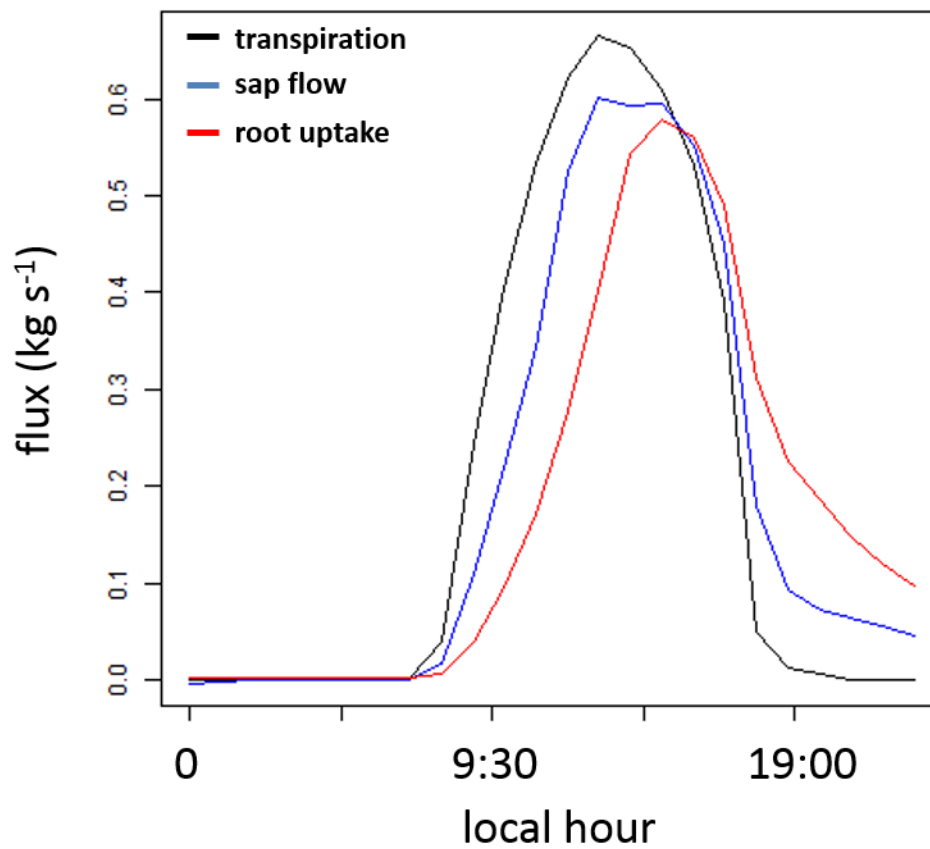

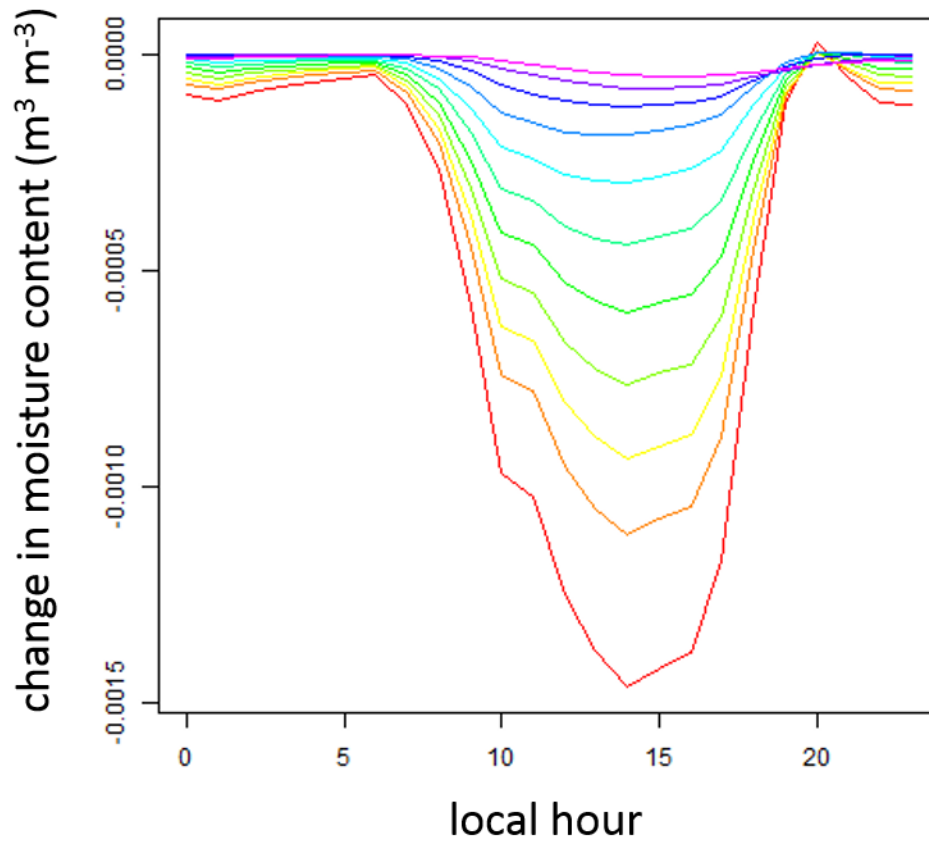

**Fig. S3.3** Cumulative transpiration flux (community-level; negative means loss of water from ecosystem) with and without accounting for the “tendency term”  $\frac{\partial Q_{top}}{\partial \theta_0}$  (change of transpiration with changes in leaf water content; see Section 5.3 of Supplement S1).

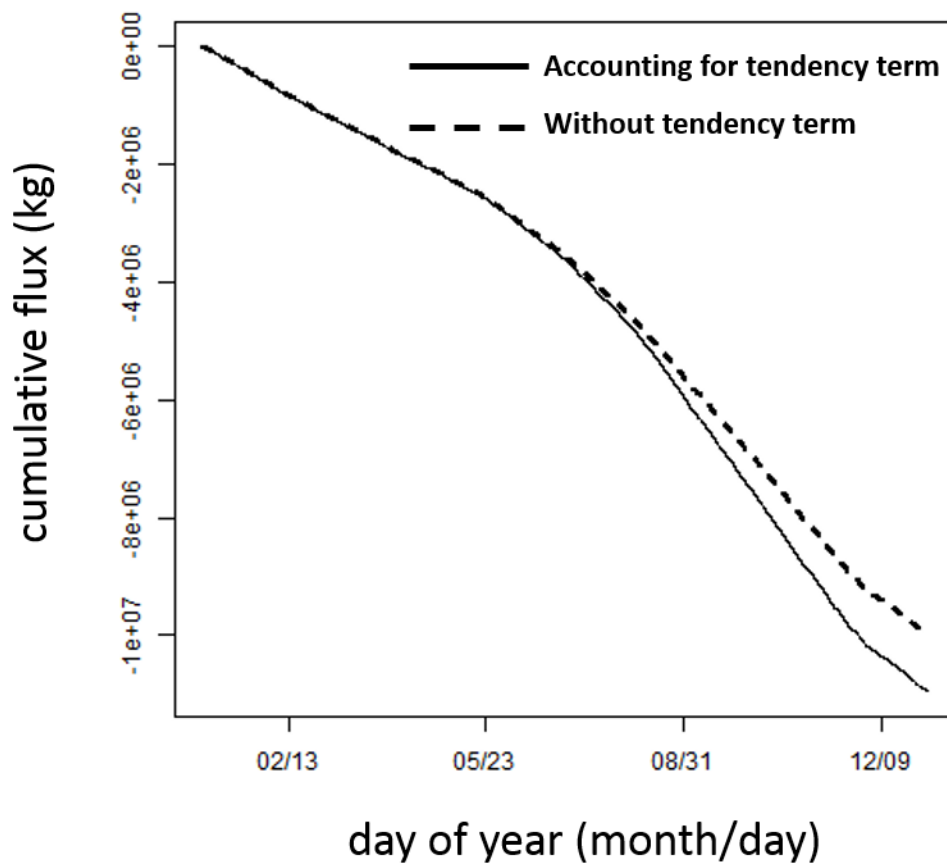

**Fig. S3.4** Same as Fig. 11 of main text except with transporting and absorbing root water potentials given.

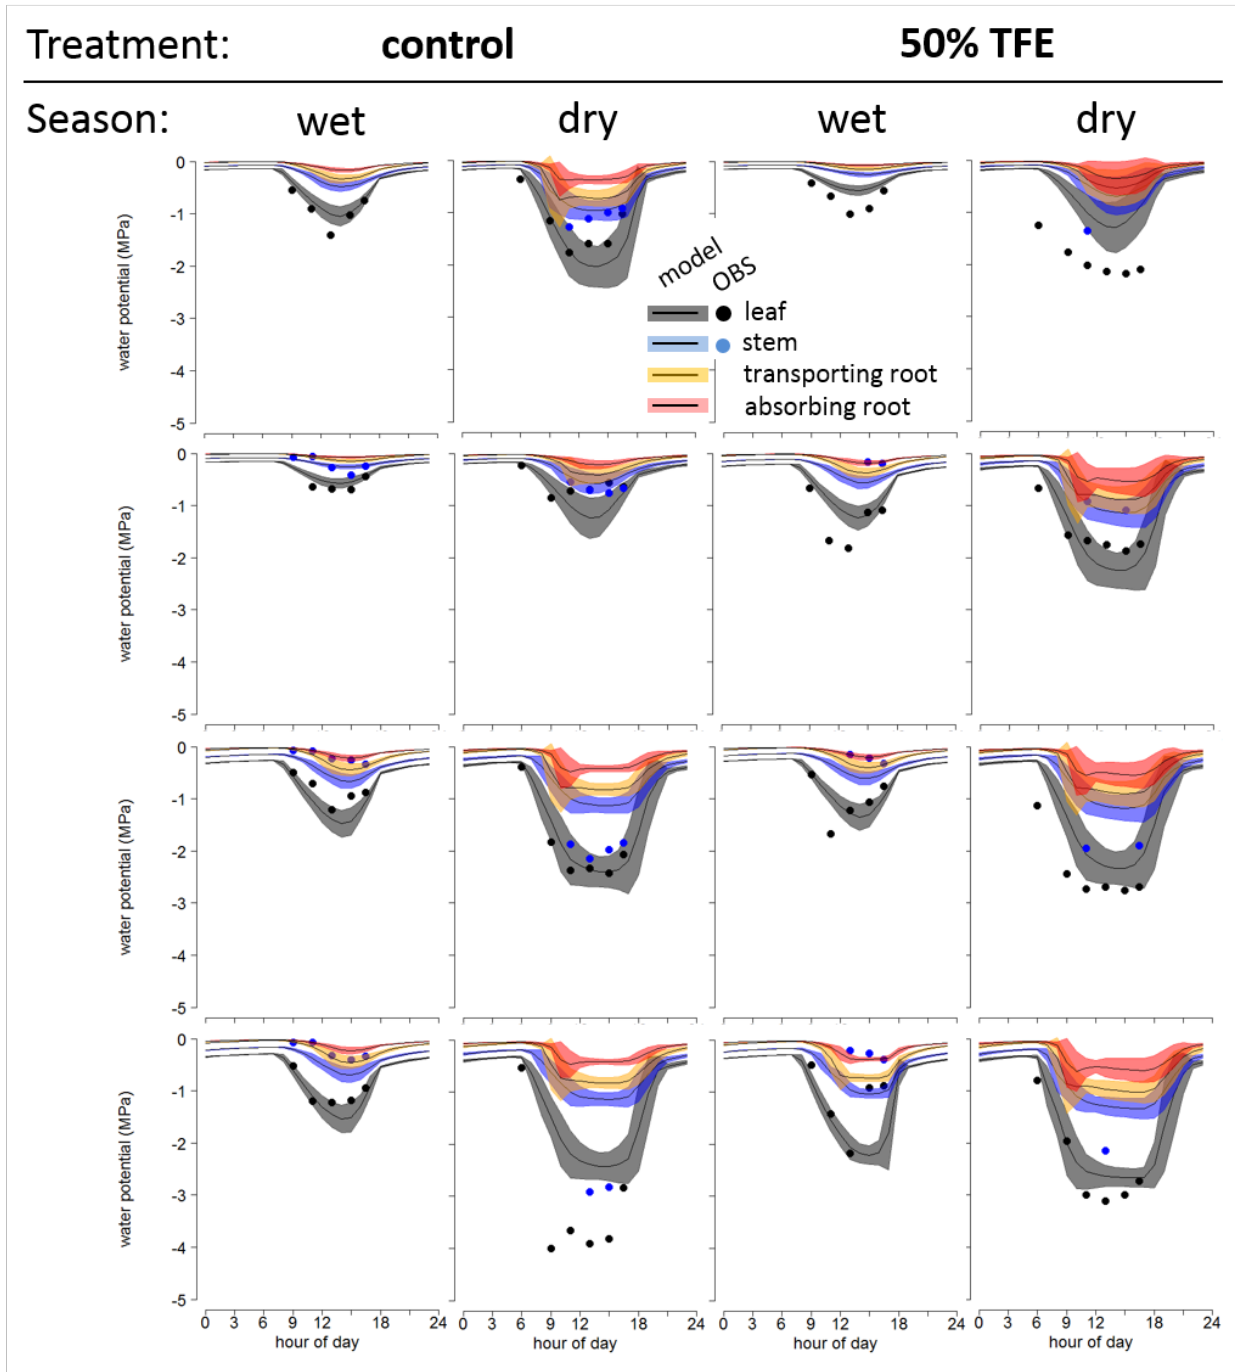

## **Supplement S4: Published references and data for hydraulic trait synthesis**

### **Leaf PV database:**

Additional data (not in published datasets; see below) which were extracted from published references and used in analyses are given in the following files:

leaf\_PV\_headers.csv: description of the variables in leaf\_PV\_new.csv

leaf\_PV\_new.csv: new extracted data not already in Bartlett et al. (2012), Bartlett et al. (2014), and Maréchaux et al. (2015).

leaf\_PV\_newreferences.xlsx: citation, bibliographic reference, and DOI for the published references from which data were extracted

Published datasets used in analyses (available as supplemental files to the original publications):

Bartlett, M. K., Zhang, Y., Kreidler, N., Sun, S., Ardy, R., Cao, K., and Sack, L.: Global analysis of plasticity in turgor loss point, a key drought tolerance trait, *Ecol Lett*, 17, 1580-1590, 2014.

Bartlett, M. K., Scoffoni, C., and Sack, L.: The determinants of leaf turgor loss point and prediction of drought tolerance of species and biomes: a global meta-analysis, *Ecology Letters*, 15, 393-405, 2012.

Maréchaux, I., Bartlett, M. K., Sack, L., Baraloto, C., Engel, J., Joetzjer, E., Chave, J., and Kitajima, K.: Drought tolerance as predicted by leaf water potential at turgor loss point varies strongly across species within an Amazonian forest, *Functional Ecology*, 29, 1268-1277, 2015.

### **Sapwood PV database (see also doi: 10.15486/NGT/1256473):**

Data extracted from published references and used in analyses are given in the following files:

sapwood\_PV\_recal\_headers.csv: description of variables in the two files below

sapwood\_PV\_recal\_corrected.csv: bias-corrected sapwood PV data presented in Fig. 3

sapwood\_PV\_recal\_uncorrected.csv: uncorrected sapwood PV data presented in Fig. S2.1 and S2.3

sapwood\_PV\_references.xlsx: citation, bibliographic reference, and DOI for the published references from which data were extracted

### **Sapwood area database (see also doi: 10.15486/NGT/1256474):**

Data extracted from published references and used in analyses are given in the following files:

SA\_headers.csv: description of variables in the two files below

SA.csv: tree size (DBH or height) sapwood area

SA\_references.xlsx: citation, bibliographic reference, and DOI for the published references from which data were extracted



## **Xylem functional traits database:**

Additional data (not in published datasets; see below) which were extracted from published references and used in analyses are given in the following files:

XFT\_headers.csv: description of the variables in XFT\_new.csv

XFT\_new.csv: new extracted data not already in the TRY XFT database (see below).

XFT\_newreferences.xlsx: citation, bibliographic reference, and DOI for the published references from which data were extracted.

All other data are available under the title “Xylem Functional Traits Database” (Choat et al., 2012; Gleason et al., 2016) in the TRY archive ([www.try-db.org](http://www.try-db.org)).

- Choat, B., Jansen, S., Brodribb, T. J., Cochard, H., Delzon, S., Bhaskar, R., Bucci, S. J., Feild, T. S., Gleason, S. M., Hacke, U. G., Jacobsen, A. L., Lens, F., Maherali, H., Martínez-Vilalta, J., Mayr, S., Mencuccini, M., Mitchell, P. J., Nardini, A., Pittermann, J., Pratt, R. B., Sperry, J. S., Westoby, M., Wright, I. J., and Zanne, A. E.: Global convergence in the vulnerability of forests to drought, *Nature*, doi: 10.1038/nature11688, 2012. 2012.
- Gleason, S. M., Westoby, M., Jansen, S., Choat, B., Hacke, U. G., Pratt, R. B., Bhaskar, R., Brodribb, T. J., Bucci, S. J., Cao, K.-F., Cochard, H., Delzon, S., Domec, J.-C., Fan, Z.-X., Feild, T. S., Jacobsen, A. L., Johnson, D. M., Lens, F., Maherali, H., Martínez-Vilalta, J., Mayr, S., McCulloh, K. A., Mencuccini, M., Mitchell, P. J., Morris, H., Nardini, A., Pittermann, J., Plavcová, L., Schreiber, S. G., Sperry, J. S., Wright, I. J., and Zanne, A. E.: Weak tradeoff between xylem safety and xylem-specific hydraulic efficiency across the world's woody plant species, *New Phytologist*, 209, 123-136, 2016.

Published references from which data were compiled or extracted for analyses from the “Xylem Functional Traits Database:”

- Brodribb, T.J., N.M. Holbrook, and M.V. Gutierrez. 2002. Hydraulic and photosynthetic coordination in seasonally dry tropical forest trees. *Plant Cell and Environment* 25: 1435-1444.
- Brodribb, T.J., N.M. Holbrook, E.J. Edwards and M.V. Gutierrez. 2003. Relations between stomatal closure, leaf turgor and xylem vulnerability in eight tropical dry forest trees. *Plant Cell and Environment* 26: 443-450.
- Bucci S.J., Goldstein G., Meinzer F.C., Scholz F.G., Franco A.C. and Bustamante M. 2004.. Functional convergence in hydraulic architecture and water relations of savanna trees: from leaf to whole plant. *Tree Physiology* 24: 891-899.
- Bucci, S.J., Scholz F.G., Goldstein G., Meinzer F.C., Franco, A.C., Campanello, P.I., Villalobos-Vega, R., Bustamante, M. and Miralles-Wilhelm, F. 2006. Nutrient availability constrains the hydraulic architecture and water relations of savanna trees. *Plant Cell and Environment* 29: 2153-2167
- Bucci, S.J. Scholz, F.G. Goldstein, G. Meinzer, F.C. Franco, A.C. Zhang Gu, Y. and Hao, Y. 2008. Water relations and hydraulic architecture in Cerrado trees: adjustments to seasonal changes in water availability and evaporative demand. *Brazilian Journal of Plant Physiology* 20: 233-245

- Oliva Carrasco L, Bucci SJ, Di Francescantonio D, Lezcano OA, Campanello PI, Scholz FG, Rodriguez S, Madanes N, Cristiano PM, Hao GY, et al. 2015. Water storage dynamics in the main stem of subtropical tree species differing in wood density, growth rate and life history traits. *Tree Physiol* **35**(4): 354-365.
- Chapotin SM, Razanameharizaka JH, Holbrook NM. 2006. Water relations of baobab trees (*Adansonia* spp. L.) during the rainy season: does stem water buffer daily water deficits? *Plant, Cell and Environment* **29**(6): 1021-1032.
- Chen J-W, Zhang Q, Cao K-F. 2009a. Inter-species variation of photosynthetic and xylem hydraulic traits in the deciduous and evergreen Euphorbiaceae tree species from a seasonally tropical forest in south-western China. *Ecological Research* **24**: 65-73.
- Chen J-W, Zhang Q, Li X-S, Cao K-F. 2009b. Independence of leaf and stem hydraulic traits in six Euphorbiaceae species with contrasting leaf phenology. *Planta* **230**: 459-468.
- Choat B, Ball MC, Lully JG, Holtum JAM. 2005. Hydraulic architecture of deciduous and evergreen dry rainforest tree species from north-eastern Australia. *Trees – Structure and Function* **19**: 305-311.
- Choat B, Sack L, Holbrook NM. 2007. Diversity of hydraulic traits in nine *Cordia* species growing in tropical forests with contrasting precipitation. *New Phytologist* **175**: 686-698.
- Fan Z-X, Zhang S-B, Hao G-Y, Slik JWF, Cao K-F. 2012. Hydraulic conductivity traits predict growth rates and adult stature of 40 Asian tropical tree species better than wood density. *Journal of Ecology* **100**: 732-741.
- Feild T.S. and Balun L. 2008. Xylem hydraulic and photosynthetic function of Gnetum (Gnetales) species from Papua New Guinea. *New Phytologist* **177**(3): 665-675.
- Field T.S., Holbrook N.M. 2000. Xylem sap flow and stem hydraulics of the vesselless angiosperm *Drimys granadensis* (Winteraceae) in a Costa Rican elfin forest. *Plant, Cell and Environment* **23**(10): 1067-1077.
- Feild, T. S., Zweiniecki, M. A., Brodribb, T., Jaffré, Tanguy, Donoghue, M. J., and Holbrook, N. M.: Structure and Function of Tracheary Elements in *Amborella trichopoda*, *International Journal of Plant Sciences*, 161, 705-712, 2000.
- Fu P-L, Jiang Y-J, Wang A-Y, Brodribb TJ, Zhang J-L, Zhu S-D, Cao K-F. 2012. Stem hydraulic traits and leaf water-stress tolerance are co-ordinated with the leaf phenology of angiosperm trees in an Asian tropical dry karst forest. *Annals of Botany* **110**: 189-199.
- Gartner, B. L., Bullock, S. H., Mooney, H. A., Brown, V. B., and Whitbeck, J. L.: Water transport properties of vine and tree stems in a tropical deciduous forest, *American Journal of Botany*, 1990. 742-749, 1990.
- Gleason, S. M., Butler, D. W., Ziemińska, K., Waryszak, P., and Westoby, M.: Stem xylem conductivity is key to plant water balance across Australian angiosperm species, *Functional Ecology*, 26, 343-352, 2012.
- Hao G-Y, Hoffmann WA, Scholz FG, Bucci SJ, Meinzer FC, Franco AC, Cao K-F, Goldstein G. 2008. Stem and leaf hydraulic congeneric tree species from adjacent tropical savanna and forest ecosystems. *Oecologia* **155**: 405-415.
- Hao, G.-Y., Sack, L., Wang, A.-Y., Cao, K.-F., and Goldstein, G.: Differentiation of leaf water flux and drought tolerance traits in hemiepiphytic and non-hemiepiphytic *Ficus* tree species, *Functional Ecology*, 24, 731-740, 2010.
- Hao, G. Y., Wang, A. Y., Liu, Z. H., Franco, A. C., Goldstein, G., and Cao, K. F.: Differentiation in light energy dissipation between hemiepiphytic and non-hemiepiphytic *Ficus* species with contrasting xylem hydraulic conductivity, *Tree Physiol*, 31, 626-636, 2011.

- Johnson DM, Domec JC, Woodruff DR, McCulloh KA, Meinzer FC. 2013. Contrasting hydraulic strategies in two tropical lianas and their host trees. *American Journal of Botany* **100**: 374–383.
- Lopez, O. R., Kursar, T. A., Chochard, H., and Tyree, M. T.: Interspecific variation in xylem vulnerability to cavitation among tropical tree and shrub species, *Tree Physiology*, 25, 1553-1562, 2005.
- Machado J-L, Tyree MT. 1994. Patterns of hydraulic architecture and water relations of two tropical canopy trees with contrasting leaf phenologies: *Ochroma pyramidale* and *Pseudobombax septenatum*. *Tree Physiology* **14**: 219–240.
- Markesteijn, L., Poorter, L., Bongers, F., Paz, H., and Sack, L.: Hydraulics and life history of tropical dry forest tree species: coordination of species' drought and shade tolerance, *New Phytologist*, 191, 480-495, 2011.
- Markesteijn L, Poorter L, Paz H, Sack L, Bongers F. 2011. Ecological differentiation in xylem cavitation resistance is associated with stem and leaf structural traits. *Plant, Cell & Environment* **34**: 137–148.
- McCulloh KA, Johnson DM, Meinzer FC, Voelker SL, Lachenbruch B, Domec J-C. 2012. Hydraulic architecture of two species differing in wood density: opposing strategies in co-occurring tropical pioneer trees. *Plant, Cell & Environment* **35**: 116–125.
- Meinzer, F. C., James, S. A., Goldstein, G., and Woodruff, D. R.: Whole-tree water transport scales with sapwood capacitance in tropical forest canopy trees, *Plant, Cell & Environment*, 26, 1147-1155, 2003.
- Meinzer, F. C., Campanello, P. I., Domec, J. C., Gatti, M. G., Goldstein, G., Villalobos-Vega, R., and Woodruff, D. R.: Constraints on physiological function associated with branch architecture and wood density in tropical forest trees, *Tree Physiology*, 28, 1609-1617, 2008.
- Melcher, P.J., Goldstein, G., Meinzer, F.C., Jones, T.J., Holbrook, N.M., and Huang, C. 2001. Water relations of coastal and estuarine *Rhizophora* mangrove: The dynamics of embolism formation and repair. *Oecologia* 126, 182-192.
- Prior L.D., Eamus D. 2000. Seasonal changes in hydraulic conductance, xylem embolism and leaf area in *Eucalyptus tetrodonta* and *Eucalyptus miniata* saplings in a north Australian savanna. *Plant Cell and Environment* 23: 955-965.
- Rice K.J., Matzner S.L., Byer W. & Brown J.R. 2004. Patterns of tree dieback in Queensland, Australia: the importance of drought stress and the role of resistance to cavitation. *Oecologia*, 139: 190 - 198.
- Santiago, L. S., Goldstein, G., Meinzer, F. C., Fisher, J. B., Machado, K., Woodruff, D., and Jones, T.: Leaf photosynthetic traits scale with hydraulic conductivity and wood density in Panamanian forest canopy trees, *Oecologia*, 140, 543-550, 2004.
- Scholz, FG, S.J. Bucci, G. Goldstein, F.C. Meinzer, A.C. Franco and F. Miralles-Welheim. 2006. Removal of nutrient limitations by long-term fertilization decreases nocturnal water loss in savanna trees. *Tree Physiology* 27: 551-559.
- Scholz, F. G., Bucci, S. J., Goldstein, G., Meinzer, F. C., Franco, A. C., and Miralles-Wilhelm, F.: Biophysical properties and functional significance of stem water storage tissues in Neotropical savanna trees, *Plant Cell and Environment*, 30, 236-248, 2007.
- Sobrado, M. A. 1996. Embolism vulnerability of an evergreen tree. *Biologia Plantarum* 38:297–301.
- Sobrado MA. 1997. Embolism vulnerability in drought-deciduous and evergreen species of a

- tropical dry forest. *Acta Oecologica* 18: 383–391.
- Tausend, P. C., G. Goldstein, and F. C. Meinzer. 2000. Water utilization, plant hydraulic properties and xylem vulnerability in three contrasting coffee (*Coffea arabica*) cultivars. *Tree Physiology* 20:159–168.
- Tyree, M. T., Snyderman, D. A., Wilmot, T. R., and Machado, J.-L.: Water relations and hydraulic architecture of a tropical tree (*Schefflera morototoni*), *Plant Physiology*, 96, 1105–1113, 1991.
- Tyree, M. T., Patino, S., and Becker, P.: Vulnerability to drought-induced embolism of Bronean heath and dipterocarp forest trees, *Tree Physiology*, 18, 583–588, 1998.
- Vander Willigen, C., and W. Pammenter. 1998. Relationship between growth and xylem hydraulic characteristics of clones of *Euclayptus* spp. at contrasting sites. *Tree Physiology* 18: 595–600.
- Vander Willigen, C., H. W. Sherwin, and W. Pammenter. 2000. Xylem hydraulic characteristics of subtropical trees from contrasting habitats grown under identical environmental conditions. *New Phytologist* 145:51–59.
- Villagra M, Campanello P, Montti L, Goldstein G. 2013a. Removal of nutrient limitations in forest gaps enhances growth rate and resistance to cavitation in subtropical canopy tree species differing in shade tolerance. *Tree Physiology* **33**: 285–296.
- Villagra, M., Campanello, P. I., Bucci, S. J., and Goldstein, G.: Functional relationships between leaf hydraulics and leaf economic traits in response to nutrient addition in subtropical tree species, *Tree Physiol*, 33, 1308–1318, 2013b.
- Zhang Y-J, Meinzer FC, Hao G-Y, Scholz FG, Bucci SJ, Takahashi FSC, Villalobos-Vega R, Giraldo JP, Cao K-F, Hoffmann WA *et al.* 2009. Size-dependent mortality in a Neotropical savanna tree: the role of height-related adjustments in hydraulic architecture and carbon allocation. *Plant, Cell & Environment* 32: 1456–1466.
- Zhu S-D, Cao K-F. 2009. Hydraulic properties and photosynthetic rates in co-occurring lianas and trees in a seasonal tropical rainforest in southwestern China. *Plant Ecology* 204: 295–304.
- Zhu S, Song J, Li R, Ye Q. 2013. Plant hydraulics and photosynthesis of 34 woody species from different successional stages of subtropical forests. *Plant, Cell & Environment* 36: 879–891.
- Zotz, G., Tyree, T. M., Patiño, S., and Carlton, R. M.: Hydraulic architecture and water use of selected species from a lower montane forest in Panama, *Trees*, 12, 302–309, 1998.
